# Supplementary material for: Haptic Error Modulation Outperforms Visual Error Amplification When Learning a Modified Gait Pattern
Source: PubMed Central journal article supplement (PMC6390202; doi:10.3389/fnins.2019.00061), 2019-02-19
Supplement: Image_1.pdf [file Image_1.pdf]

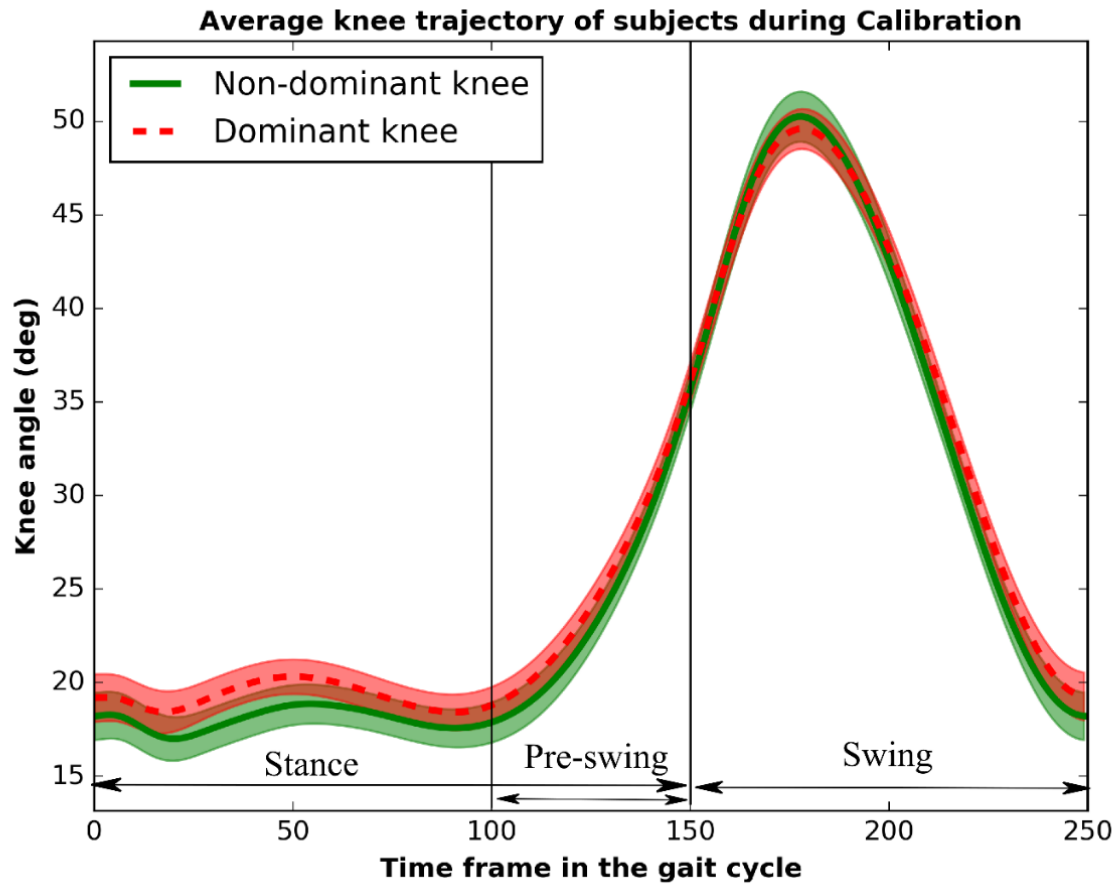

**Figure A1:** Average knee trajectory of dominant and non-dominant leg at the beginning of the experiment (Calibration) and average gait phases calculated as percentage of the whole gait cycle.
