# Supplementary material for: Haptic Error Modulation Outperforms Visual Error Amplification When Learning a Modified Gait Pattern
Source: PubMed Central journal article supplement (PMC6390202; doi:10.3389/fnins.2019.00061), 2019-02-19
Supplement: Image_3.pdf [file Image_3.pdf]

Perceived Competence Changes (Error Amplification Groups)

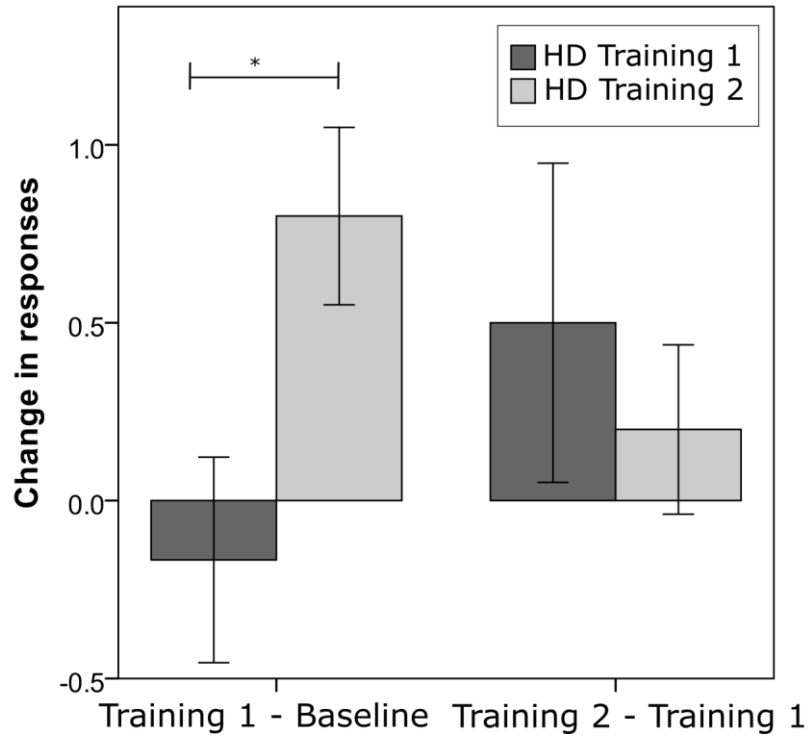

**Figure A3:** Changes on perceived competence after each training block for error amplification groups' subjects trained with haptic disturbance during training session 1 (dark grey) and with haptic disturbance during training session 2 (light grey). \*  $p < 0.05$ , ·  $p < 0.1$ . The asterisks show significant differences between training conditions for a given experimental phase. Error bars:  $\pm 1$  SE.
