# Supplementary material for: Haptic Error Modulation Outperforms Visual Error Amplification When Learning a Modified Gait Pattern
Source: PubMed Central journal article supplement (PMC6390202; doi:10.3389/fnins.2019.00061), 2019-02-19
Supplement: Table_1.pdf [file Table_1.pdf]

**Table A1.** Results from the linear mixed-effects model with training blocks as time factors (Baseline, Training1.1, Training1.2, Training2.1, Training2.2) and tracking error as dependent variable

|                   | <b>Estimate</b> | <b>SE</b> | <b>95% CI</b>  | <b><i>p</i>-value</b> |
|-------------------|-----------------|-----------|----------------|-----------------------|
| Intercept         | 0.060           | 0.005     | 0.048, 0.070   | < 0.001***            |
| HEA               | -0.019          | 0.008     | -0.033, -0.003 | 0.019*                |
| VEA               | -0.004          | 0.008     | -0.017, 0.014  | 0.636                 |
| Training1.1       | -0.009          | 0.005     | -0.019, -0.001 | 0.077 <sup>·</sup>    |
| Training1.2       | -0.014          | 0.005     | -0.025, -0.004 | 0.005**               |
| Training2.1       | -0.021          | 0.005     | -0.031, -0.011 | < 0.001***            |
| Training2.2       | -0.014          | 0.005     | -0.024, -0.004 | 0.006**               |
| HEA × Training1.1 | 0.004           | 0.007     | -0.011, 0.018  | 0.575                 |
| VEA × Training1.1 | 0.015           | 0.007     | 0.001, 0.028   | 0.035*                |
| HEA × Training1.2 | 0.010           | 0.007     | -0.004, 0.026  | 0.148                 |
| VEA × Training1.2 | 0.016           | 0.007     | 0.001, 0.030   | 0.023*                |
| HEA × Training2.1 | 0.011           | 0.007     | 0.001, 0.031   | 0.033*                |
| VEA × Training2.1 | 0.013           | 0.007     | -0.004, 0.025  | 0.130                 |
| HEA × Training2.2 | 0.009           | 0.007     | -0.005, 0.024  | 0.212                 |
| VEA × Training2.2 | 0.012           | 0.007     | -0.003, 0.025  | 0.104                 |

SE: standard error; CI: confidence interval using parametric bootstrapping. Reference level for group factor is Control and for time factor is Baseline. \*\*\* $p \leq 0.001$ , \*\* $p \leq 0.01$ , \* $p \leq 0.05$ , <sup>·</sup> $p \leq 0.1$
