# Supplementary material for: Haptic Error Modulation Outperforms Visual Error Amplification When Learning a Modified Gait Pattern
Source: PubMed Central journal article supplement (PMC6390202; doi:10.3389/fnins.2019.00061), 2019-02-19
Supplement: Table_2.pdf [file Table_2.pdf]

**Table A2.** Results from the linear mixed-effects model with retention blocks as time factors (baseline, mid-training retention [MTR] and short-term retention [STR]) and tracking error as dependent variable

|           | <b>Estimate</b> | <b>SE</b> | <b>95% CI</b>  | <b><i>p</i>-value</b> |
|-----------|-----------------|-----------|----------------|-----------------------|
| Intercept | 0.060           | 0.005     | 0.049, 0.067   | < 0.001***            |
| HEA       | -0.019          | 0.007     | -0.029, -0.003 | 0.009**               |
| VEA       | -0.004          | 0.007     | -0.019, 0.005  | 0.598                 |
| MTR       | -0.017          | 0.005     | -0.029, -0.007 | < 0.001***            |
| STR       | -0.019          | 0.005     | -0.029, -0.009 | < 0.001***            |
| HEA × MTR | 0.013           | 0.007     | -0.001, 0.028  | 0.080                 |
| VEA × MTR | 0.015           | 0.007     | 0.007, 0.034   | 0.028*                |
| HEA × STR | 0.015           | 0.007     | 0.001, 0.03    | 0.038*                |
| VEA × STR | 0.007           | 0.007     | -0.003, 0.026  | 0.319                 |

SE: standard error; CI: confidence interval using parametric bootstrapping. Reference level for group factor is Control and for time factor is Baseline. \*\*\* $p \leq 0.001$ , \*\* $p \leq 0.01$ , \* $p \leq 0.05$ ,  $p \leq 0.1$
