# Supplementary material for: Haptic Error Modulation Outperforms Visual Error Amplification When Learning a Modified Gait Pattern
Source: PubMed Central journal article supplement (PMC6390202; doi:10.3389/fnins.2019.00061), 2019-02-19
Supplement: Table_3.pdf [file Table_3.pdf]

**Table A3.** Results from the linear mixed-effects model with free walking as time factors (Calibration, FW1, FW2) of impact in hips asymmetry.

|           | <b>Estimate</b> | <b>SE</b> | <b>95% CI</b> | <b><i>p</i>-value</b> |
|-----------|-----------------|-----------|---------------|-----------------------|
| Intercept | -0.010          | 0.032     | -0.078, 0.053 | 0.745                 |
| HEA       | 0.023           | 0.046     | -0.072, 0.123 | 0.619                 |
| VEA       | 0.016           | 0.045     | -0.072, 0.094 | 0.971                 |
| FW1       | 0.012           | 0.027     | -0.042, 0.065 | 0.676                 |
| FW2       | 0.023           | 0.027     | -0.034, 0.079 | 0.413                 |
| HEA × FW1 | -0.026          | 0.040     | -0.106, 0.060 | 0.523                 |
| VEA × FW1 | 0.068           | 0.039     | -0.011, 0.137 | 0.087                 |
| HEA × FW2 | -0.005          | 0.040     | -0.094, 0.074 | 0.908                 |
| VEA × FW2 | 0.045           | 0.039     | -0.029, 0.124 | 0.249                 |

SE: standard error; CI: confidence interval using parametric bootstrapping. Reference level for group factor is Control and for time factor is Calibration. \*  $p \leq 0.05$ ,  $\gamma p \leq 0.1$ .
